# Supplementary material
Source: PubMed Central journal article supplement (PMC2584612)
Supplement: NIHMS73586-supplement-01.pdf [file NIHMS73586-supplement-01.pdf]

Figure s1A

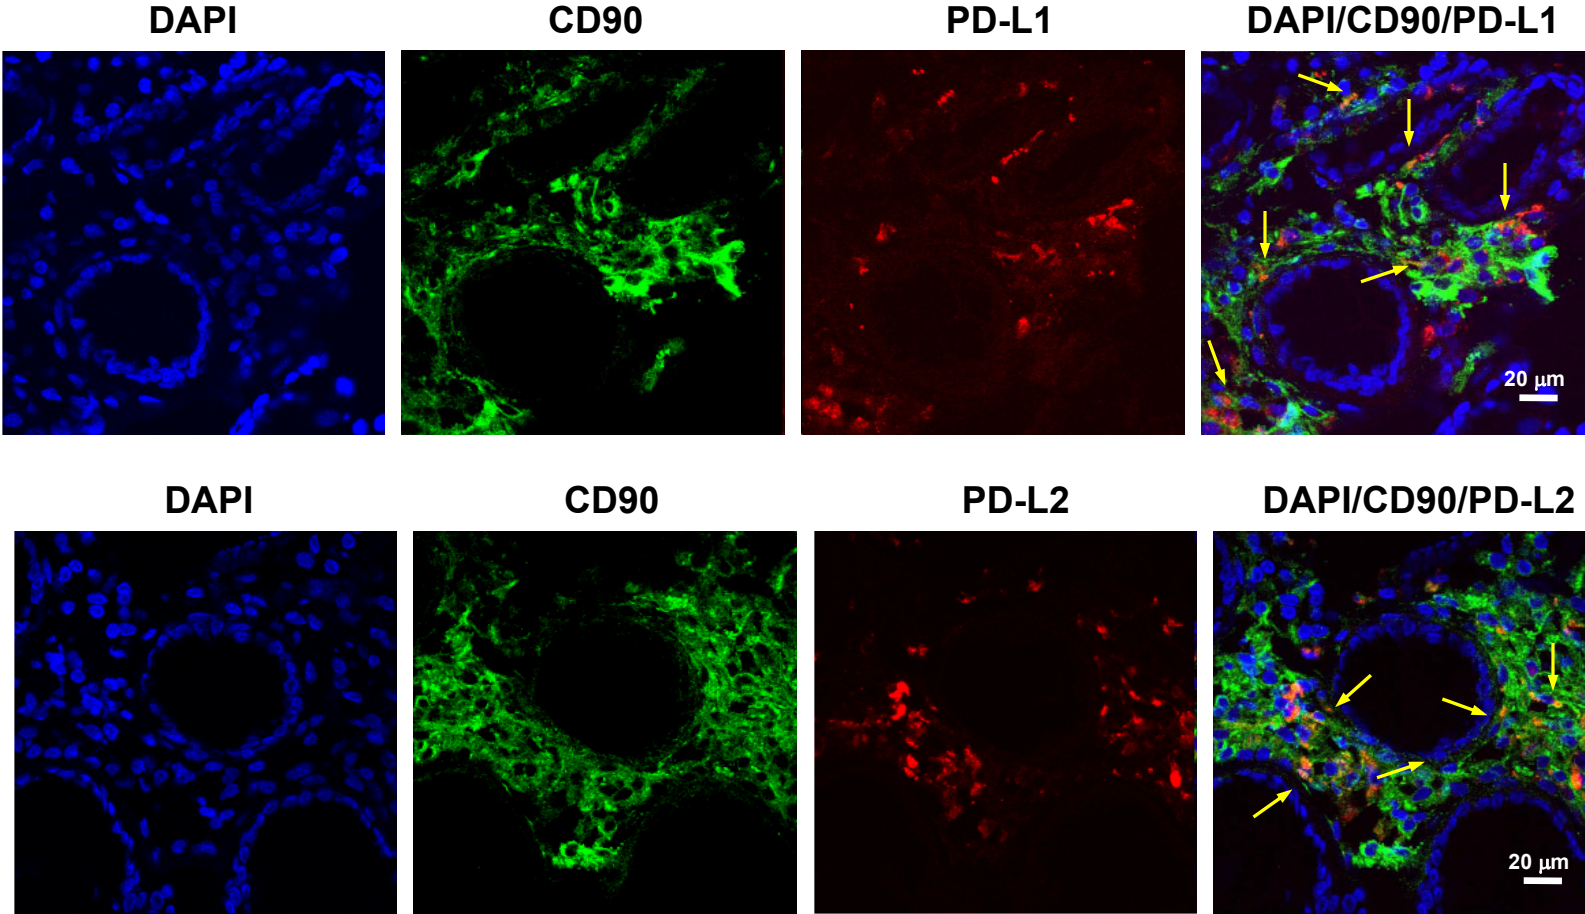

Figure s1B

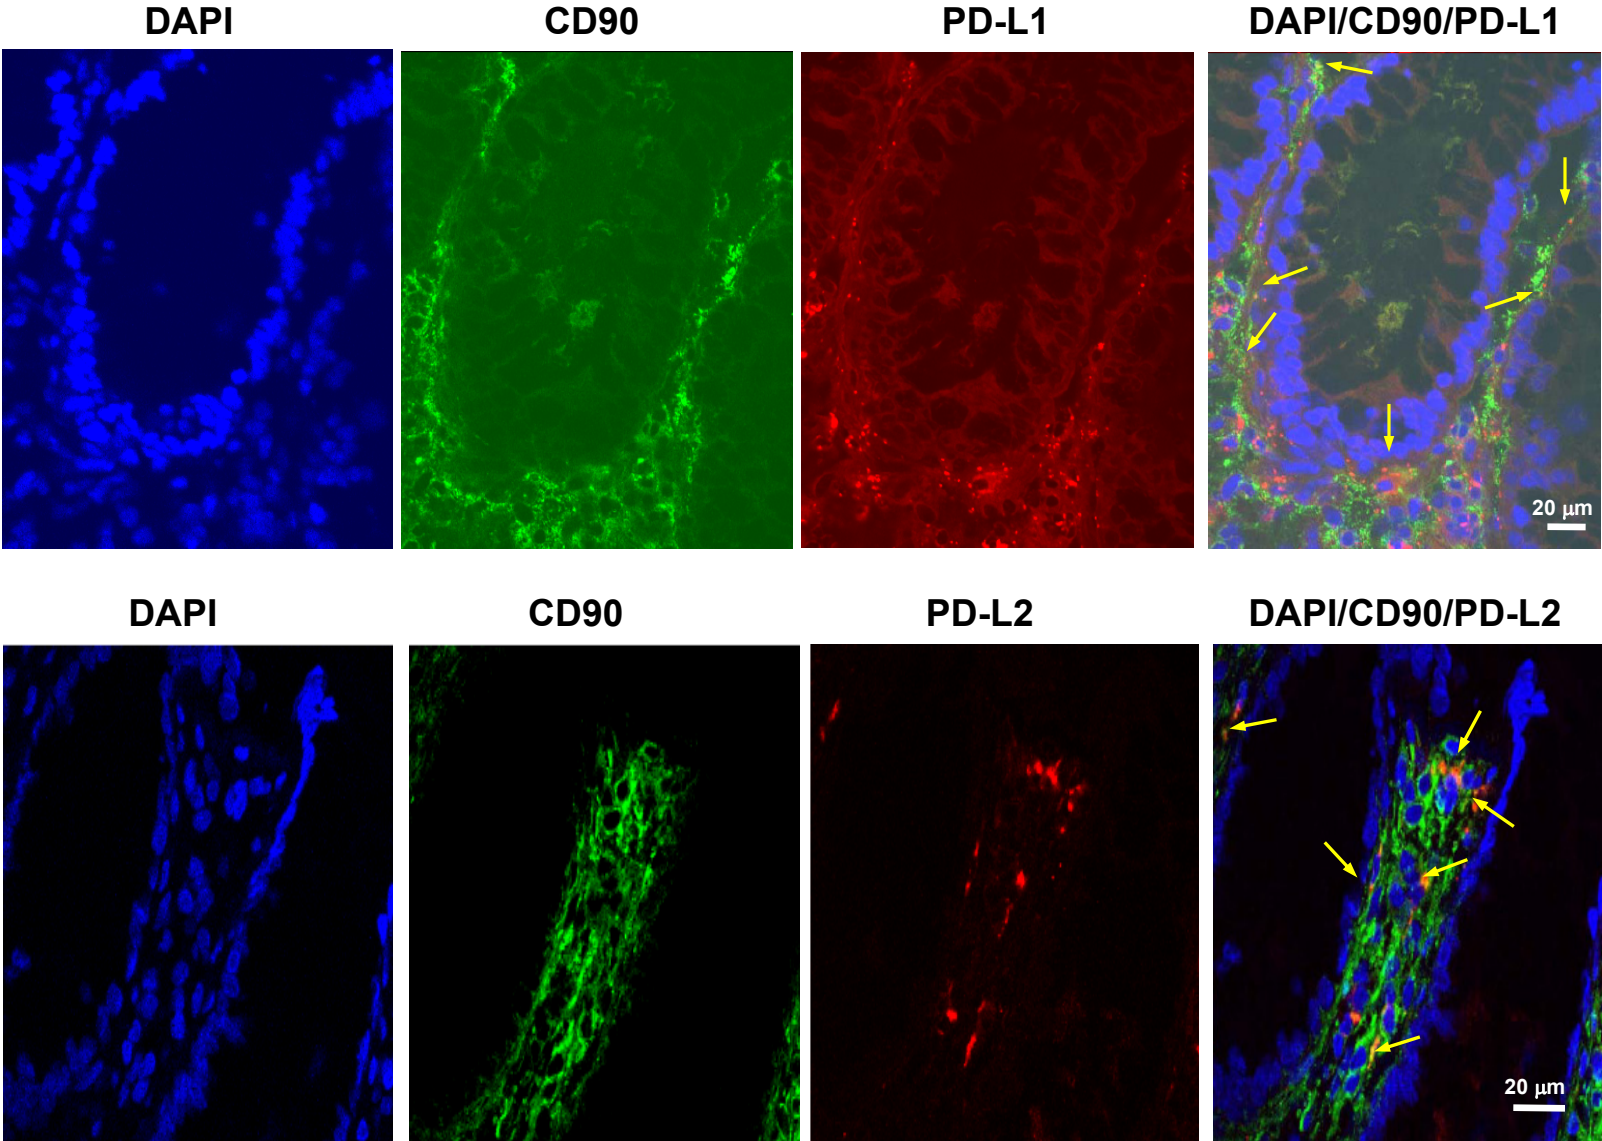

**Figure s1.** CD90+ myofibroblasts/fibroblast express PD-L1 and PD-L2 molecules *in situ*. The panels show confocal microscopy analysis of multicolor immunofluorescent staining of a representative (A) cross and (B) longitudinal frozen tissue sections fixed in 2% paraformaldehyde of a normal human colonic crypt. The fibroblast/myofibroblast cell population was identified in colonic mucosa based on their morphology, lamina propria location and positive immunoreactivity for surface marker CD90 (myofibroblast/fibroblast marker). Cell nuclei (in blue) were stained with DAPI. Subepithelial pericryptal myofibroblast/fibroblasts were identified by their expression of surface CD90 (in green) as detected by AF®488 conjugated anti-human CD90 murine mAbs (clone ASO2). PD-L1 or PD-L2 staining (in red) of colonic mucosa was performed using AF®647 labeled anti-PD-L1 murine mAbs (clone M1H1) or anti-PD-L2 murine mAbs (clone M1H18). Merged images A-C clearly demonstrate expression of PD-L1 and PD-L2 on CD90+ cells (e.g. myofibroblasts/fibroblasts, in orange-yellow staining) as highlighted with arrows. Merged image using high power resolution confocal image analysis of multicolor immunofluorescent staining of the same cryosection confirm the observations above. Calibration bars are 20 µm.
